# Supplementary material for: Impact of Marine Aquaculture on the Microbiome Associated with Nearby Holobionts: The Case of Patella caerulea Living in Proximity of Sea Bream Aquaculture Cages
Source: PubMed Central journal article supplement (PMC7927081; doi:10.3390/microorganisms9020455), 2021-02-22
Supplement: microorganisms-09-00455-s001.pdf [file microorganisms-09-00455-s001.pdf]

# Sediment samples

Control site

Aquaculture site

## Phyla

**A**

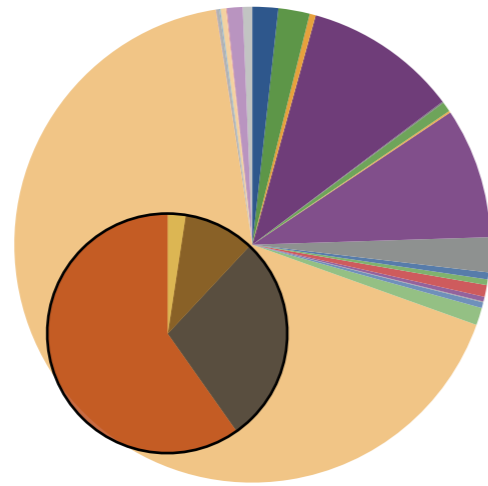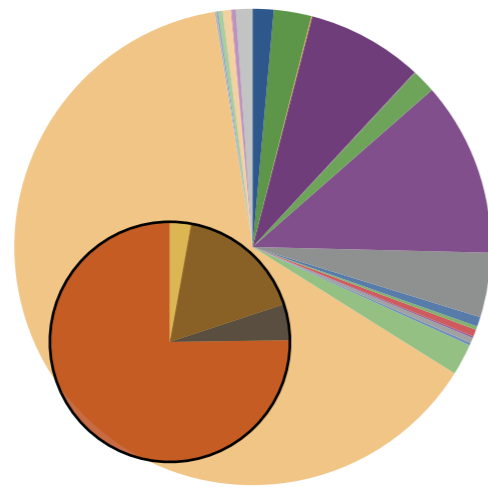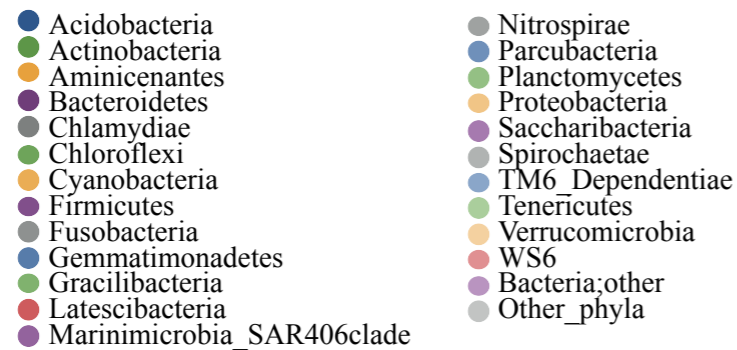

### Subclasses

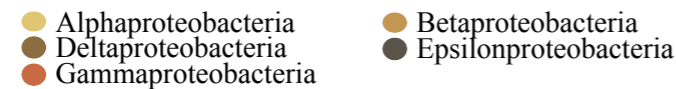

## Families

**B**

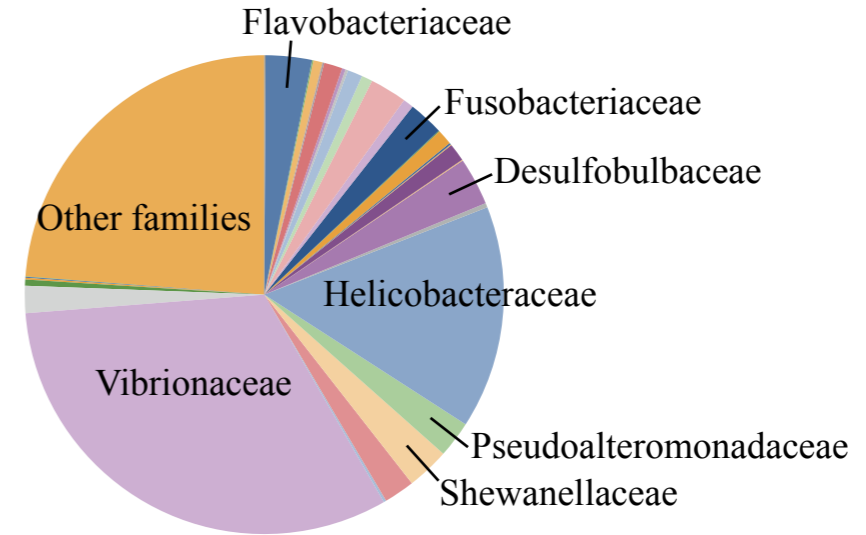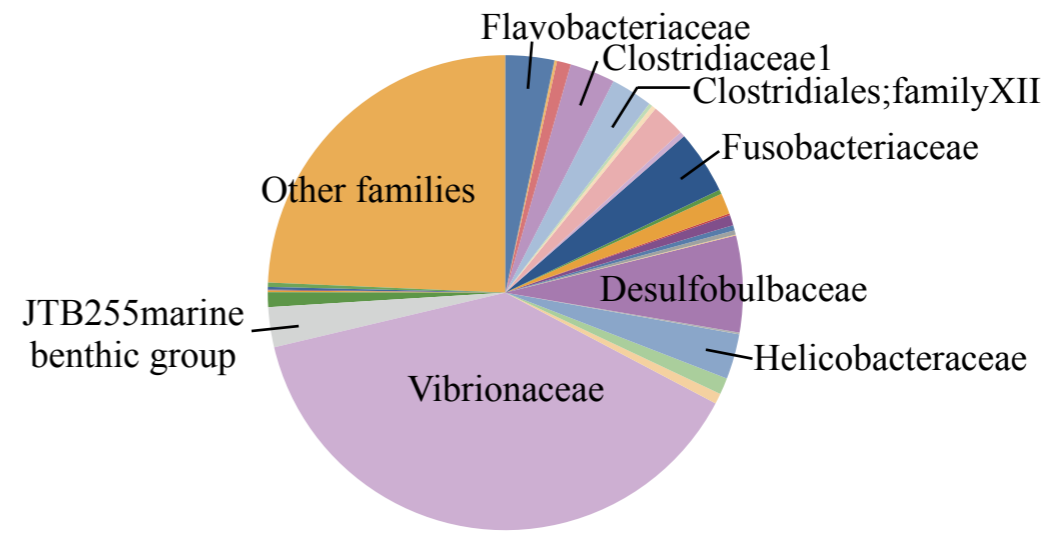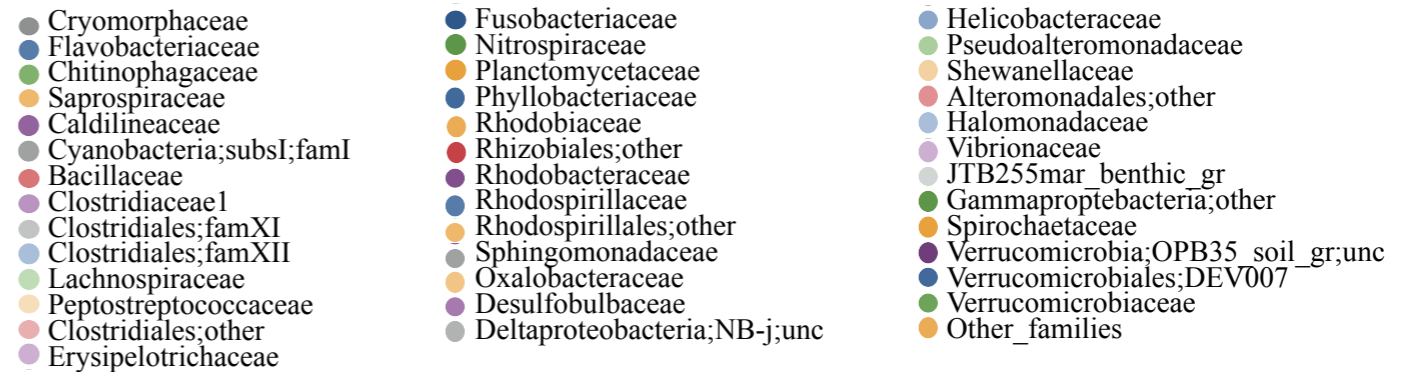

**Supplementary figure S1** - Pie charts summarizing the phylum (A) and family (B) level microbiota composition of sediment samples in the two sampling sites. Phyla with relative abundance > 0.5% in at least one sample and families with relative abundance > 2% in at least 10% of samples are represented. Proteobacteria classes are expanded on the respective pie chart phylum slice. subs=subset; fam=family; unc=uncultured; inc=incertae; mar=marine; gr=group.

# Seawater samples

Control site

Aquaculture site

## Phyla

**A**

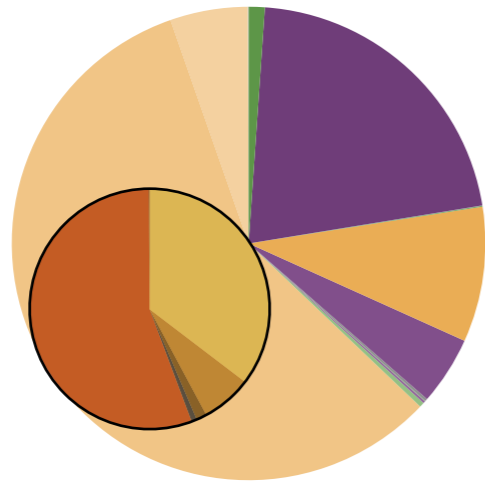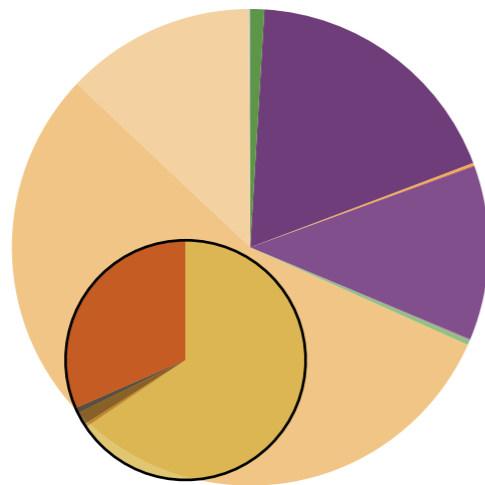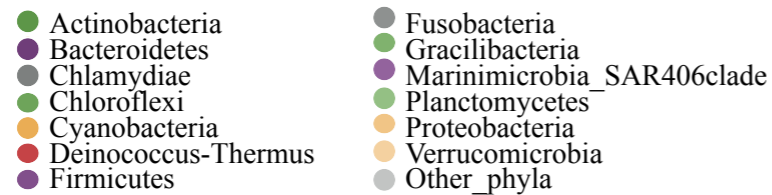

### Subclasses

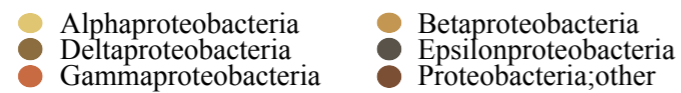

## Families

**B**

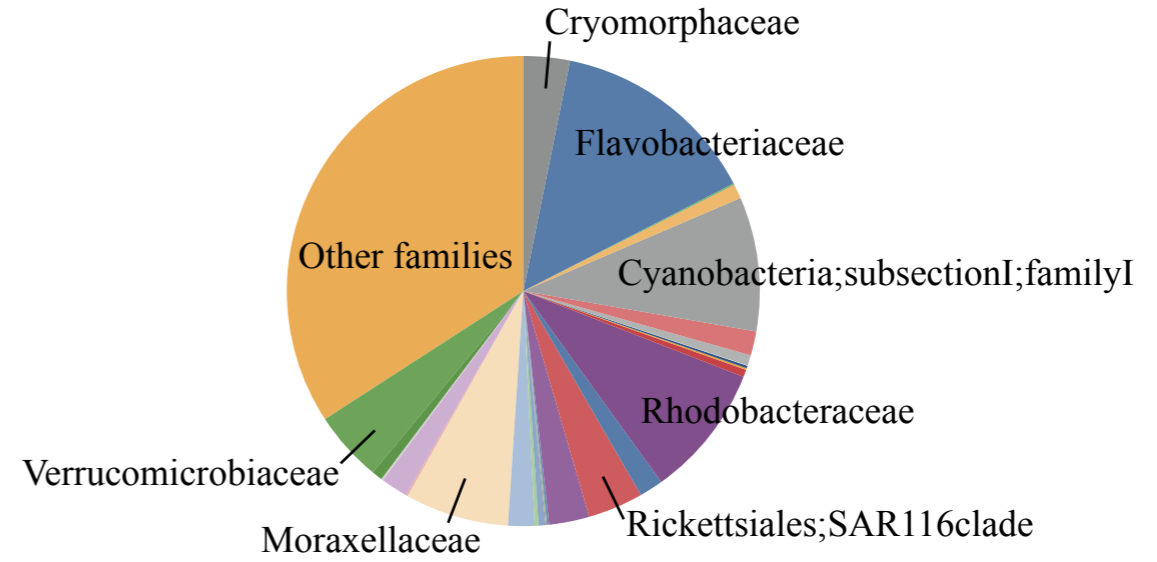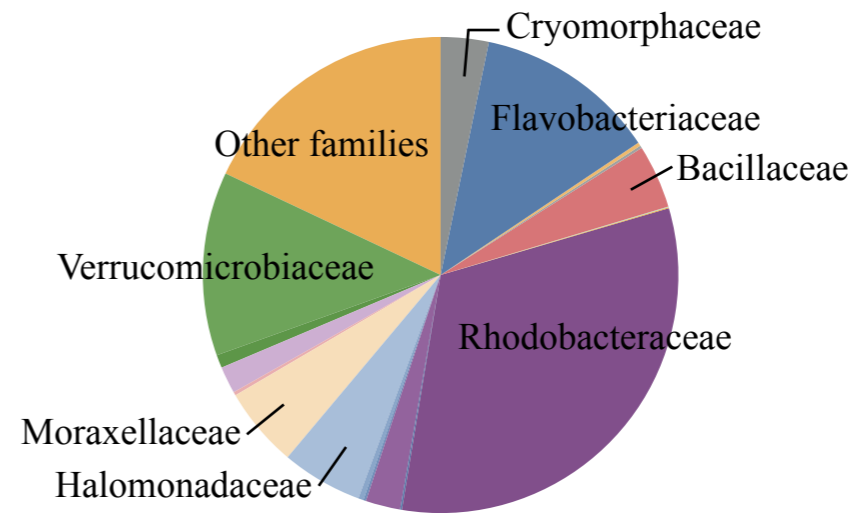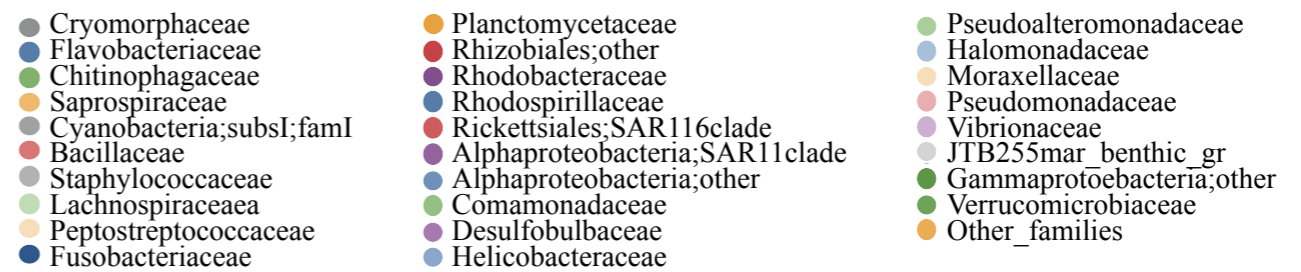

**Supplementary figure S2** - Pie charts summarizing the phylum (A) and family (B) level microbiota composition of seawater samples in the two sampling sites. Phyla with relative abundance > 0.5% in at least one sample and families with relative abundance > 2% in at least 10% of samples are represented. Proteobacteria classes are expanded on the respective pie chart phylum slice. subs=subset; fam=family; unc=uncultured; inc=incertae; mar=marine; gr=group.

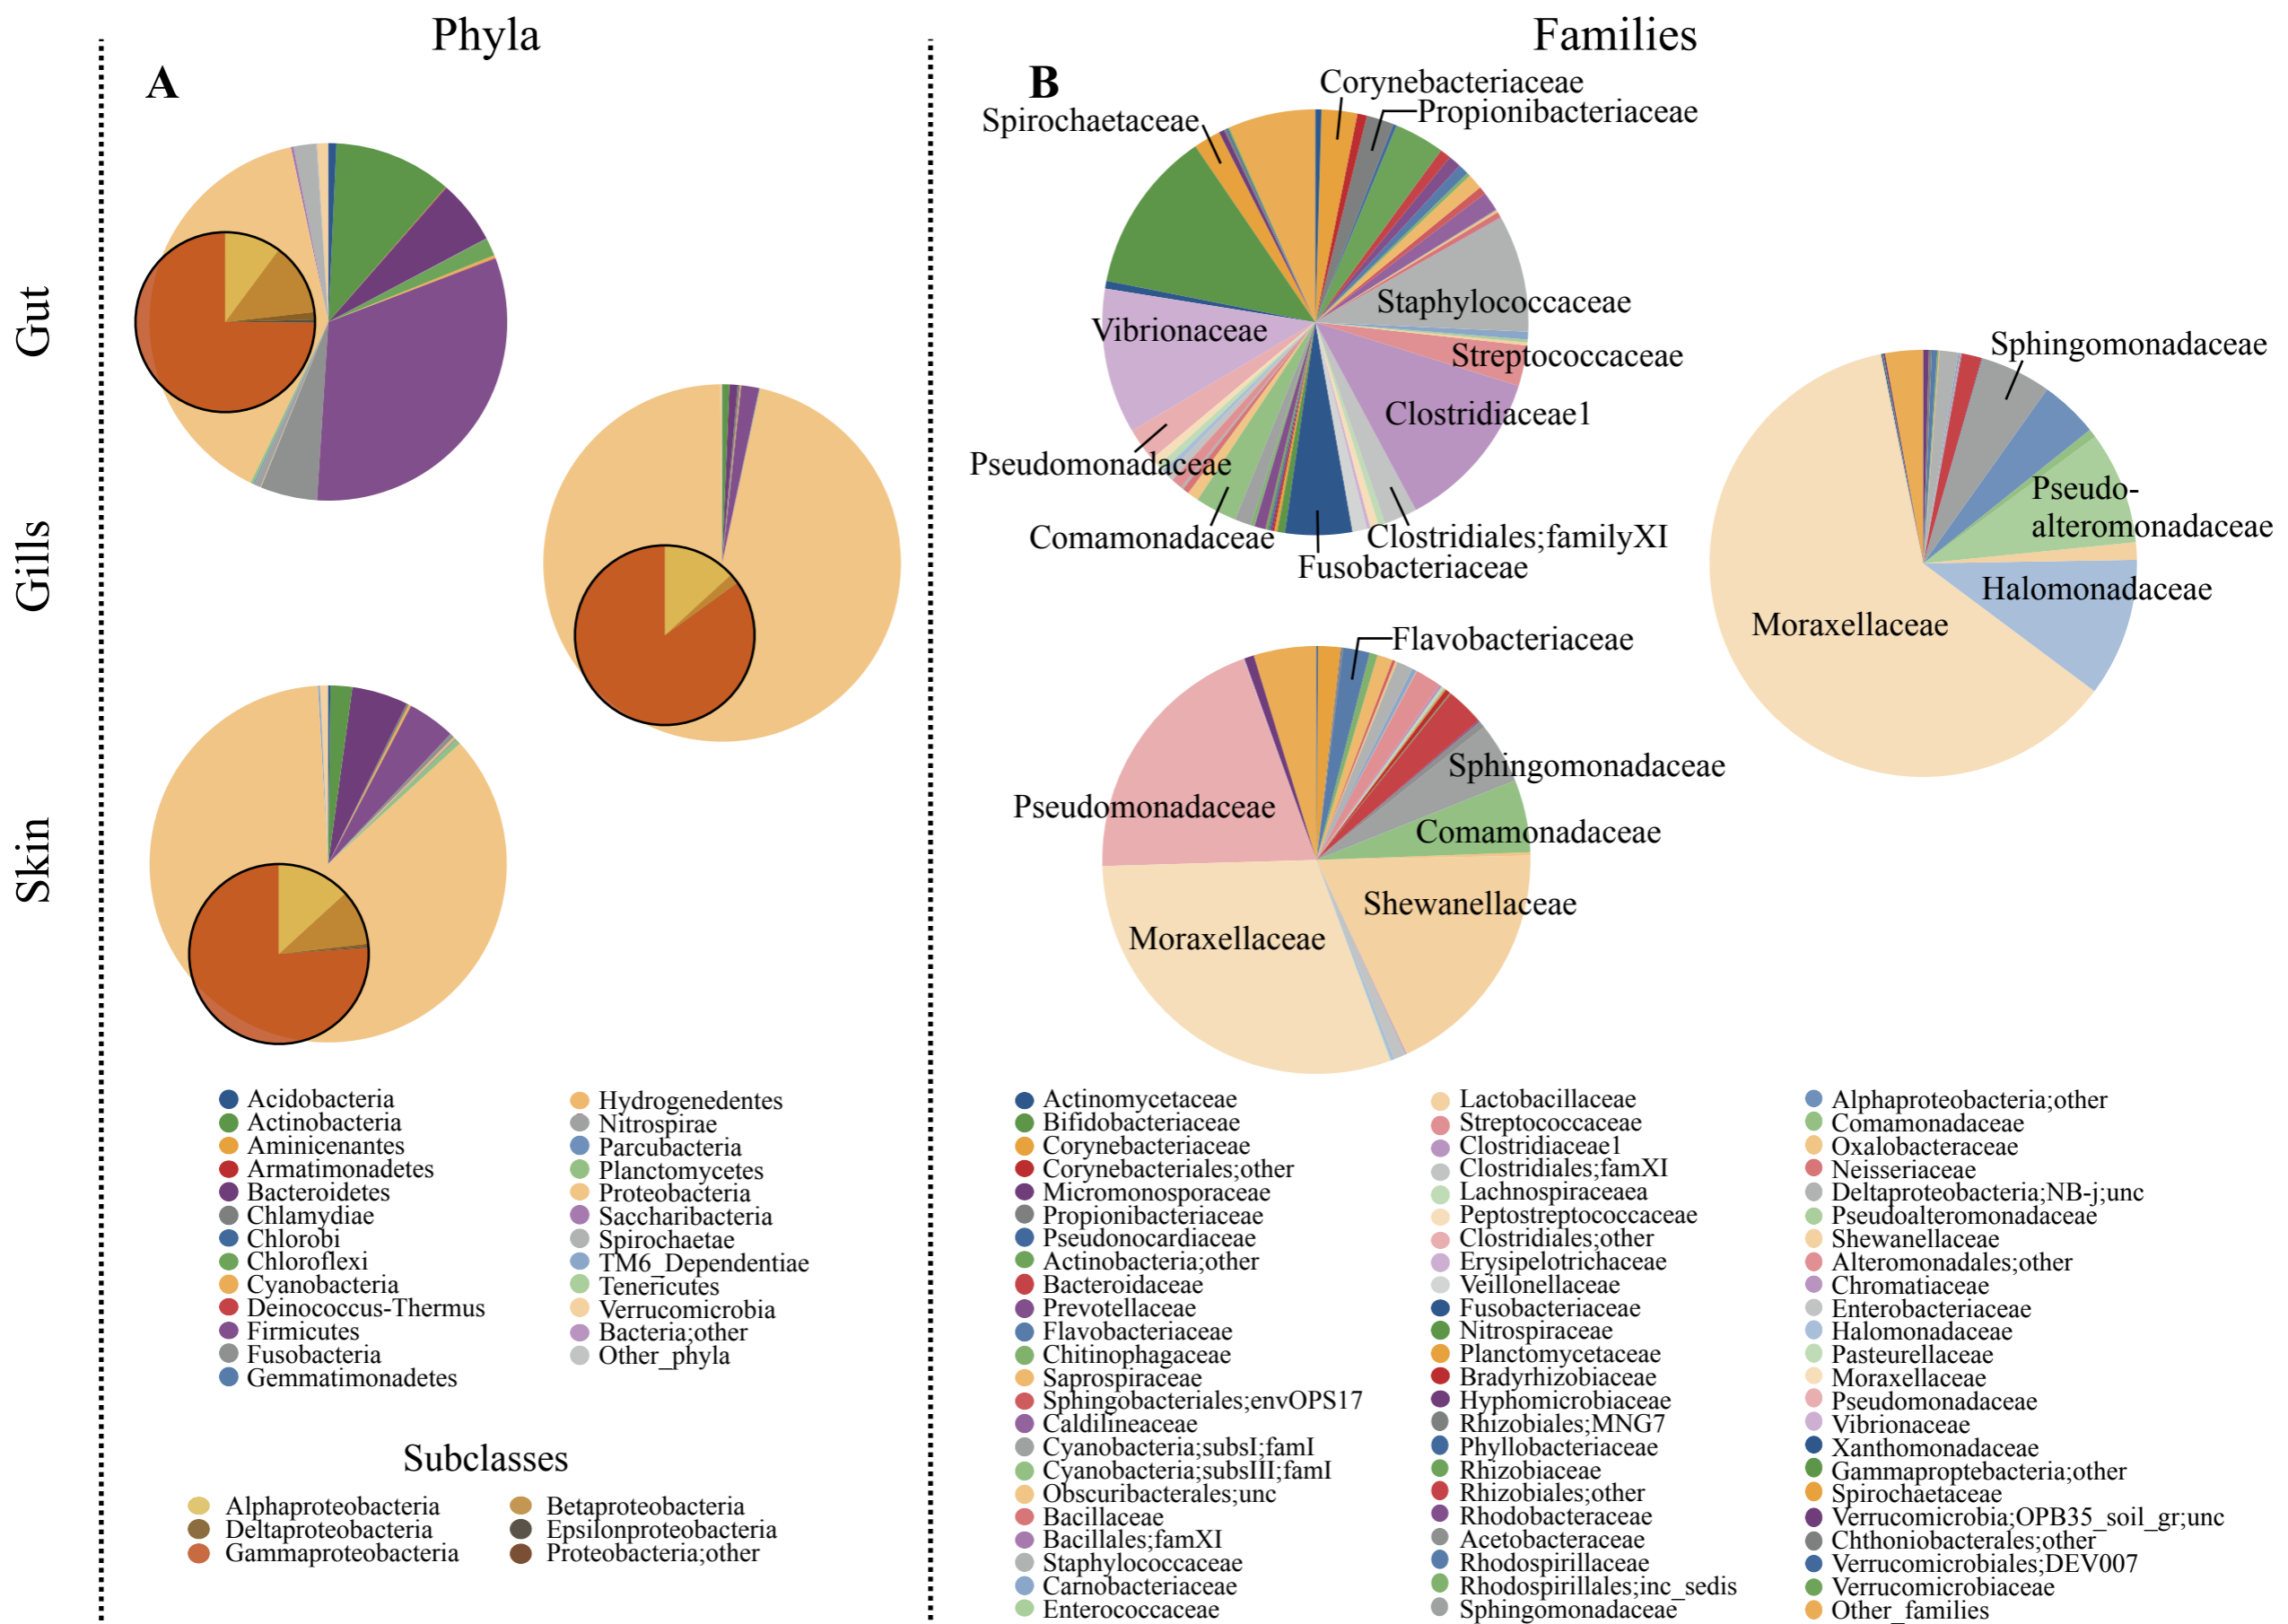

**Supplementary figure S3** - Pie charts summarizing the phylum (A) and family (B) level microbiota composition of *S. aurata* samples in the three fish districts (feces, gills and skin). Phyla with relative abundance > 0.5% in at least one sample and families with relative abundance > 2% in at least 10% of samples are represented. Proteobacteria classes are expanded on the respective pie chart phylum slice. subs=subset; fam=family; unc=uncultured; inc=incertae; mar=marine; gr=group.

|                  | OTU_ID                           | BLAST                                | Control site r.a. (%) |          |          | Aquaculture site r.a. (%) |          |          |        | p-value |
|------------------|----------------------------------|--------------------------------------|-----------------------|----------|----------|---------------------------|----------|----------|--------|---------|
|                  |                                  |                                      | <i>P. caerulea</i>    | Sediment | Seawater | <i>P. caerulea</i>        | Sediment | Seawater | Fish   |         |
| Control site     | 4667                             | <i>Fodinicurvata halophila</i>       | 0.19                  | 0.00     | 0.00     | 0.00                      | 0.00     | 0.00     | 0.00   | 0.004   |
|                  | 11135                            | <i>Lactobacillus johnsonii</i>       | 0.10                  | 0.00     | 0.00     | 0.04                      | 0.00     | 0.00     | 0.00   | 0.05    |
|                  | 4454                             | <i>Fluviibacterium aquatile</i>      | 0.22                  | 0.00     | 0.00     | 0.00                      | 0.00     | 0.00     | 0.00   | 0.0004  |
|                  | 5034                             | <i>Robiginitalea biformata</i>       | 0.06                  | 0.02     | 0.00     | 0.00                      | 0.00     | 0.00     | 0.00   | 0.03    |
|                  | 12220                            | <i>Rhodobacteraceae</i>              | 0.13                  | 0.00     | 0.00     | 0.00                      | 0.00     | 0.00     | 0.00   | 0.0001  |
|                  | 1496                             | <i>Agaricicola taiwanensis</i>       | 0.48                  | 0.00     | 0.00     | 0.02                      | 0.00     | 0.00     | 0.00   | 0.01    |
|                  | 4069                             | <i>Amorphus coralli</i>              | 0.10                  | 0.00     | 0.00     | 0.01                      | 0.00     | 0.00     | 0.00   | 0.02    |
|                  | 4330                             | <i>Ochrobactrum oryzae</i>           | 0.11                  | 0.00     | 0.00     | 0.00                      | 0.00     | 0.00     | 0.00   | 0.02    |
|                  | 14127                            | <i>Rubinisphaera brasiliensis</i>    | 0.09                  | 0.00     | 0.00     | 0.00                      | 0.00     | 0.00     | 0.00   | 0.02    |
|                  | 5331                             | <i>Roseibacillus ponti</i>           | 0.06                  | 0.00     | 0.00     | 0.00                      | 0.00     | 0.00     | 0.00   | 0.0008  |
|                  | 2911                             | <i>Actibacter sediminis</i>          | 0.29                  | 0.03     | 0.00     | 0.00                      | 0.13     | 0.00     | 0.00   | 0.0004  |
|                  | 2289                             | <i>Psychrobacter celer</i>           | 0.03                  | 0.00     | 0.17     | 0.00                      | 0.00     | 0.07     | 0.06   | 0.008   |
|                  | 14154                            | <i>Phyllobacterium</i>               | 0.20                  | 0.00     | 0.00     | 0.06                      | 0.00     | 0.00     | 0.00   | 0.04    |
|                  | 3304                             | <i>Stappia taiwanensis</i>           | 0.31                  | 0.00     | 0.00     | 0.00                      | 0.00     | 0.00     | 0.00   | 0.00002 |
|                  | 11232                            | <i>Rubinisphaera italica</i>         | 0.07                  | 0.00     | 0.00     | 0.00                      | 0.00     | 0.00     | 0.00   | 0.03    |
|                  | 1355                             | <i>Prochlorococcus marinus</i>       | 0.02                  | 0.02     | 1.18     | 0.00                      | 0.01     | 1.88     | 0.01   | 0.007   |
|                  | 11155                            | <i>Lactobacillus rhamnosus</i>       | 0.24                  | 0.00     | 0.00     | 0.00                      | 0.00     | 0.00     | 0.00   | 0.006   |
|                  | 14091                            | <i>Bifidobacterium bifidum</i>       | 0.83                  | 0.00     | 0.00     | 0.02                      | 0.00     | 0.00     | 0.00   | 0.003   |
|                  | 11445                            | <i>Ahrensia kielensis</i>            | 0.13                  | 0.00     | 0.00     | 0.00                      | 0.00     | 0.00     | 0.00   | 0.0007  |
|                  | 3555                             | <i>Bifidobacterium longum</i>        | 0.50                  | 0.00     | 0.00     | 0.01                      | 0.00     | 0.00     | 0.00   | 0.0004  |
| 2120             | <i>Photobacterium swingsii</i>   | 0.23                                 | 0.02                  | 0.00     | 0.01     | 0.00                      | 0.00     | 0.00     | 0.003  |         |
| 4234             | <i>Hyphomicrobium</i>            | 0.07                                 | 0.00                  | 0.00     | 0.00     | 0.00                      | 0.00     | 0.00     | 0.03   |         |
| Aquaculture site | 4187                             | <i>Phyllobacteriaceae</i>            | 0.00                  | 0.00     | 0.00     | 0.13                      | 0.00     | 0.00     | 0.00   | 0.0003  |
|                  | 11247                            | <i>Rhodopirellula</i>                | 0.00                  | 0.00     | 0.00     | 0.13                      | 0.00     | 0.00     | 0.00   | 0.03    |
|                  | 11243                            | <i>Alienimonas californiensis</i>    | 0.00                  | 0.00     | 0.00     | 0.35                      | 0.00     | 0.00     | 0.00   | 0.001   |
|                  | 11205                            | <i>Wenxinia marina</i>               | 0.00                  | 0.00     | 0.00     | 0.09                      | 0.00     | 0.00     | 0.00   | 0.003   |
|                  | 6912                             | <i>Mycoplasma mobile</i>             | 0.45                  | 0.00     | 0.00     | 2.92                      | 0.00     | 0.00     | 0.00   | 0.0004  |
|                  | 5244                             | <i>Acinetobacter guillouiae</i>      | 0.03                  | 0.00     | 0.00     | 0.16                      | 0.00     | 0.00     | 0.00   | 0.04    |
|                  | 4203                             | <i>Mesorhizobium thioanganeticum</i> | 0.00                  | 0.00     | 0.00     | 0.36                      | 0.00     | 0.00     | 0.00   | 0.003   |
|                  | 2259                             | <i>Mycoplasma mobile</i>             | 0.02                  | 0.00     | 0.00     | 0.19                      | 0.00     | 0.00     | 0.00   | 0.002   |
|                  | 4097                             | <i>Mesorhizobium camelthorni</i>     | 0.00                  | 0.00     | 0.00     | 0.37                      | 0.00     | 0.00     | 0.00   | 0.0002  |
|                  | 2073                             | <i>Halomonas</i>                     | 0.05                  | 0.00     | 0.00     | 0.18                      | 0.00     | 0.00     | 0.00   | 0.05    |
|                  | 12731                            | <i>Sphingomonas</i>                  | 0.37                  | 0.00     | 0.00     | 1.96                      | 0.00     | 0.00     | 0.00   | 0.001   |
|                  | 11913                            | <i>Sphingomonas</i>                  | 0.06                  | 0.00     | 0.00     | 0.40                      | 0.00     | 0.00     | 0.00   | 0.0006  |
|                  | 4065                             | <i>Sulfitobacter pontiacus</i>       | 0.00                  | 0.00     | 0.03     | 0.20                      | 0.00     | 0.00     | 0.00   | 0.03    |
|                  | 4965                             | <i>Rhodopirellula baltica</i>        | 0.00                  | 0.00     | 0.00     | 0.07                      | 0.00     | 0.00     | 0.00   | 0.03    |
|                  | 2118                             | <i>Vibrio atypicus</i>               | 0.42                  | 0.01     | 0.00     | 0.63                      | 0.00     | 0.00     | 0.00   | 0.02    |
|                  | 1919                             | <i>Staphylococcus</i>                | 0.01                  | 0.01     | 0.01     | 0.06                      | 0.00     | 0.01     | 0.39   | 0.04    |
|                  | 2077                             | <i>Mycoplasma mobile</i>             | 0.05                  | 0.00     | 0.00     | 0.33                      | 0.00     | 0.00     | 0.00   | 0.005   |
|                  | 2154                             | <i>Mycoplasma mobile</i>             | 0.03                  | 0.00     | 0.00     | 0.16                      | 0.00     | 0.00     | 0.00   | 0.002   |
|                  | 11213                            | <i>Rubinisphaera italica</i>         | 0.01                  | 0.00     | 0.00     | 0.27                      | 0.00     | 0.00     | 0.00   | 0.005   |
|                  | 1397                             | <i>Foliisarcina bertogensis</i>      | 0.00                  | 0.00     | 0.00     | 0.10                      | 0.00     | 0.00     | 0.00   | 0.002   |
| 11152            | <i>Bacteroides</i>               | 0.00                                 | 0.00                  | 0.00     | 0.08     | 0.00                      | 0.00     | 0.00     | 0.006  |         |
| 2080             | <i>Psychrobacter marincola</i>   | 0.00                                 | 0.00                  | 0.19     | 0.13     | 0.00                      | 0.03     | 0.00     | 0.02   |         |
| 14234            | <i>Sulfurovum lithotrophicum</i> | 0.00                                 | 0.82                  | 0.00     | 0.01     | 0.08                      | 0.00     | 0.00     | 0.01   |         |
| 4465             | <i>Phyllobacteriaceae</i>        | 0.00                                 | 0.00                  | 0.00     | 0.27     | 0.00                      | 0.00     | 0.00     | 0.0001 |         |
| 4305             | <i>Marimonas arenosa</i>         | 0.00                                 | 0.00                  | 0.00     | 0.14     | 0.00                      | 0.00     | 0.00     | 0.04   |         |
| 6020             | <i>Pseudomonas</i>               | 0.00                                 | 0.00                  | 0.00     | 0.07     | 0.00                      | 0.00     | 0.08     | 0.01   |         |
| 3237             | <i>Bythopirellula goksoyri</i>   | 0.00                                 | 0.00                  | 0.00     | 0.13     | 0.00                      | 0.00     | 0.00     | 0.03   |         |
| 6006             | <i>Gimesia maris</i>             | 0.02                                 | 0.00                  | 0.00     | 0.14     | 0.00                      | 0.00     | 0.00     | 0.05   |         |

**Supplementary table S1** - Ecological distribution and highest score alignment against NCBI 16S rRNA database of OTUs showing a significantly higher mean relative abundance in the limpets collected from control site with respect to those from the aquaculture cage and vice versa. P-values were calculated for the two *P. caerulea* groups (control vs. aquaculture, FDR-corrected Wilcoxon rank-sum test, p-value  $\leq 0.05$ ). Species, genera or families are retrieved on the BLAST column based on the last common taxonomic level shared between all BLAST best hits.

**Supplementary table S2** - Seawater environmental data. Measurements (N = 6 per site) are shown for the control and aquaculture sites. Measured parameters, namely T, pH, TA and salinity (38‰ in control and 34‰ in the in the aquaculture site) were used to calculate the carbonate chemistry parameters through CO2SYS Software. T = Temperature; TA = Total Alkalinity; pCO<sub>2</sub> = carbon dioxide partial pressure; HCO<sub>3</sub><sup>-</sup> = bicarbonate; CO<sub>3</sub><sup>2-</sup> = carbonate; DIC = dissolved inorganic carbon; Ω<sub>arag</sub> = aragonite saturation; NS = not significant; \*\*p<0.01, Mann-Whitney test. In brackets the 95% confidence interval.

|              | T (°C)      | pH <sub>NBS</sub> | TA<br>(μmol kg <sup>-1</sup> ) | pCO <sub>2</sub><br>(μatm) | HCO <sub>3</sub> <sup>-</sup><br>(μmol kg <sup>-1</sup> ) | CO <sub>3</sub> <sup>2-</sup><br>(μmol kg <sup>-1</sup> ) | DIC<br>(μmol kg <sup>-1</sup> ) | Ω <sub>arag</sub> |
|--------------|-------------|-------------------|--------------------------------|----------------------------|-----------------------------------------------------------|-----------------------------------------------------------|---------------------------------|-------------------|
| Control      | 27.3        | 8.02              | 2319                           | 667                        | 1898                                                      | 170                                                       | 2086                            | 2.67              |
|              | (26.9-27.6) | (8.00-8.04)       | (2315-2324)                    | (620-714)                  | (1882-1914)                                               | (164-177)                                                 | (2075-2097)                     | (2.57-2.76)       |
| Aquaculture  | 24.8        | 7.96              | 2203                           | 700                        | 1877                                                      | 132.1                                                     | 2030                            | 2.11              |
|              | (24.7-24.9) | (7.95-7.97)       | (2191-2213)                    | (682-717)                  | (1872-1883)                                               | (130-134)                                                 | (2026-2033)                     | (2.07-2.14)       |
| Mann-Whitney | **          | **                | **                             | NS                         | **                                                        | **                                                        | **                              | **                |
